## RESEARCH ARTICLE

# The orphan pentameric ligand-gated ion channel pHCl-2 is gated by pH and regulates fluid secretion in *Drosophila* Malpighian tubules

Daniel Feingold<sup>1</sup>, Tanja Starc<sup>2</sup>, Michael J. O'Donnell<sup>3</sup>, Laura Nilson<sup>1</sup> and Joseph A. Dent<sup>1,\*</sup>

## ABSTRACT

Pentameric ligand-gated ion channels (pLGICs) constitute a large protein superfamily in metazoa whose role as neurotransmitter receptors mediating rapid, ionotropic synaptic transmission has been extensively studied. Although the vast majority of pLGICs appear to be neurotransmitter receptors, the identification of pLGICs in non-neuronal tissues and homologous pLGIC-like proteins in prokaryotes points to biological functions, possibly ancestral, that are independent of neuronal signalling. Here, we report the molecular and physiological characterization of a highly divergent, orphan pLGIC subunit encoded by the *pHCl-2* (*CG11340*) gene, in *Drosophila melanogaster*. We show that pHCl-2 forms a channel that is insensitive to a wide array of neurotransmitters, but is instead gated by changes in extracellular pH. *pHCl-2* is expressed in the Malpighian tubules, which are non-innervated renal-type secretory tissues. We demonstrate that pHCl-2 is localized to the apical membrane of the epithelial principal cells of the tubules and that loss of pHCl-2 reduces urine production during diuresis. Our data implicate pHCl-2 as an important source of chloride conductance required for proper urine production, highlighting a novel role for pLGICs in epithelial tissues regulating fluid secretion and osmotic homeostasis.

**KEY WORDS:** pLGIC, Cys-loop ligand-gated ion channel, Renal, Diuresis

## INTRODUCTION

Pentameric ligand-gated ion channels (pLGICs) constitute a superfamily of ionotropic neurotransmitter receptors that includes vertebrate Cys-loop nicotinic acetylcholine, GABA, glycine and 5HT<sub>3</sub> receptors (Jones and Sattelle, 2006; Karlin, 2002; Littleton and Ganetzky, 2000; Putrenko et al., 2005). pLGICs play a central role in mediating rapid ionotropic neurotransmission and are expressed in all characterized bilateria (Dent, 2006). These channels typically reside on postsynaptic membranes of excitable cells and open in response to the binding of neurotransmitter released from presynaptic axon terminals. Ligand binding induces allosteric changes to protein conformation that result in the opening of a transmembrane, ion-selective pore that initiates the flow of specific ions down their electrochemical gradients, altering the

membrane potential of the postsynaptic cell (Lummis et al., 2005; Purohit et al., 2007). The subunits of pLGICs have a stereotypical tertiary structure that consists of three general domains: an amino-terminal extracellular ligand-binding domain, four transmembrane domains (M1–M4), which collectively form the ion-permeable channel pore, and an intracellular loop between M3 and M4 (Dent, 2006; Hille, 2001; Sine and Engel, 2006; Tasneem et al., 2005). Functional channels can exist as homomers, or as heteromers, containing as many as five distinct channel subunits (Boulin et al., 2008).

Sequencing of invertebrate genomes has led to the recognition that the pLGIC subunit superfamily is much larger and more diverse than was previously realized based on work in vertebrate nervous systems. Vertebrate genomes encode five main classes of pLGICs that have been defined based on ligand specificity: the cation-selective nicotinic acetylcholine receptors, serotonin 5HT<sub>3</sub> receptors and zinc-activated receptors and the anion-selective GABA and glycine receptors (Davies et al., 2003; Le Novère et al., 2002; Ortells and Lunt, 1995). Invertebrate genomes, in contrast, encode a greater assortment of channel types with a wider range of ligand specificities and ligand–ion combinations than those found in vertebrates (Dent, 2006). In addition to the nicotinic acetylcholine and GABA receptors found in vertebrates, invertebrate genomes encode anion-selective acetylcholine (Putrenko et al., 2005; van Nierop et al., 2005), histamine (Gengs et al., 2002; Zheng et al., 2002), glutamate (Dent et al., 1997; Dufour et al., 2013; Kehoe et al., 2009), serotonin (Ranganathan et al., 2000), dopamine (Ringstad et al., 2009), tyramine (Ringstad et al., 2009) and pH (Mounsey et al., 2007; Schnizler et al., 2005) channels, as well as cation-selective GABA (Gisselmann et al., 2004) and proton (Beg et al., 2008) channels. Moreover, multiple putative invertebrate pLGICs have been identified that cannot be assigned to any neurotransmitter family based on sequence homology.

The biological functions of pLGICs are also likely to be much more diverse than has generally been appreciated. For instance, the cation-selective, proton-activated PBO-5,-6 channel in *Caenorhabditis elegans* mediates an intercellular pH signal that stimulates muscle contraction (Beg et al., 2008). The proton signal is generated by a proton pump in the intestine rather than by synaptic release from neurons. The function of the *Drosophila melanogaster* pHCl channel, which is open under alkaline conditions, is not known but its expression in the nervous system and the hindgut suggests non-canonical roles in signalling and/or ion regulation (Schnizler et al., 2005). Finally, the discovery of the proton-gated channel from the cyanobacterium *Gloeobacter violaceus* suggests that pLGICs originally evolved to regulate ion homeostasis in response to environmental changes (Bocquet et al., 2009; Tasneem et al., 2005).

Here, we show that CG11340, a putative pLGIC subunit in *D. melanogaster* which we have named pHCl-2, forms a pH-gated

<sup>1</sup>Department of Biology, McGill University, 1205 Dr Penfield, Montreal, QC, Canada H3A 1B1. <sup>2</sup>Institute of Neuroscience, Technische Universität München, Biedersteiner Strasse 29, München Bau 601D-80802, Germany. <sup>3</sup>Department of Biology, McMaster University, 1280 Main Street West, Hamilton, ON, Canada L8S 4K1.

\*Author for correspondence (joseph.dent@mcgill.ca)

 J.A.D., 0000-0001-5817-5426

chloride channel that is expressed in the Malpighian tubules, which are non-innervated secretory tissues. pHCl-2 channels are localized to the apical (lumen-facing) membrane of Malpighian tubule principal cells, precluding a role in responding to humoral signals originating in the haemolymph. We present evidence that, instead, pHCl-2 regulates fluid secretion by the Malpighian tubules in response to the pH of urine by controlling chloride counter-ion availability. Based on these data, we propose a new role for pLGICs in ion homeostasis and implicate pHCl-2 in a previously unrecognized mechanism regulating urine secretion, a mechanism that will enrich current models of insect secretion.

## MATERIALS AND METHODS

### Cloning pHCl-2 cDNA

To isolate the *CG11340* cDNA – which we refer to hereafter as *pHCl-2* based on its electrophysiological properties and the prior existence of a homologous *Drosophila* gene, *pHCl* (see below) – whole RNA was purified from adult Oregon-R flies. First-strand cDNA was synthesized using oligo (dT) primers and AMV (avian myeloblastosis virus) reverse transcriptase (Invitrogen). The *pHCl-2* open reading frame was amplified by PCR using the primers 5'-CGAATTCATATGGATACACTTGGGATTTTCGT-A-3' and 5'-TGCTCTAGATCAAAGGCAGTAGACCAGGGT-3'. The resulting PCR product was cloned into the pDONR201 vector by ligation using the *NdeI* and *XbaI* sites encoded in the primers. Using the published *Drosophila* genome sequence as a reference (www.flybase.org), two non-synonymous polymorphisms in the 527 amino acid protein predicted by this cDNA were identified: Thr<sup>57</sup>-Ala and Pro<sup>82</sup>-Ser. These polymorphisms were also present in the *pHCl-2* genomic DNA from the Oregon-R fly strain used to amplify the cDNA, suggesting that the polymorphisms represent naturally occurring variations in the coding sequence.

### Sequence analysis

Using ClustalW2 software (http://www.ebi.ac.uk/Tools/msa/clustalw2/), the predicted *pHCl-2* amino acid sequence was aligned to that of the previously characterized *Drosophila* RDL GABA channel subunit to identify the presence of the primary functional domains common to pLGICs. The annotated amino acid sequence of the *Drosophila* RDL channel from Jones and Sattelle (2006) was used as a reference to identify the extracellular ligand-binding domain, the four transmembrane domains and the intracellular loop between the third and fourth transmembrane domain.

### *pHCl-2* expression in *Xenopus* oocytes and electrophysiology

The *pHCl-2* cDNA was subcloned into a modified pT7 *Xenopus* expression vector (Cary et al., 1994) using *NdeI* and *XbaI* cloning sites (described above). The resulting pT7-*pHCl-2* construct was linearized with *BamHI* and capped RNA (cRNA) was synthesized using the mMESSAGE mMACHINE T7 *in vitro* transcription kit (Ambion). *pHCl-2* cRNA was then dissolved in RNase-free water.

Oocytes were harvested from mature *Xenopus laevis* according to standard procedures (Goldin, 1992) approved by the McGill University animal safety committee. Oocytes were maintained at room temperature in ND96 solution (96 mmol l<sup>-1</sup> NaCl, 2 mmol l<sup>-1</sup> KCl, 1.8 mmol l<sup>-1</sup> CaCl<sub>2</sub>, 1 mmol l<sup>-1</sup> MgCl<sub>2</sub> and 5 mmol l<sup>-1</sup> Hepes) and injected with 40 nl of cRNA at varying concentrations (60 ng μl<sup>-1</sup> to 1 μg μl<sup>-1</sup>) using a Nanoject microinjection system (Drummond Scientific). Oocytes injected with 40 nl water were used as controls. Oocytes were incubated at 15°C for 12–24 h before recordings were initiated.

Injected oocytes were analysed by two-electrode voltage clamp (TEVC) using a Maltese Cross chamber perfusion system (ALA Scientific Instruments). Oocytes were voltage clamped at –80 mV and then exposed to test compounds. Data were recorded at 1 kHz using Clampex 8.1 digital oscilloscope software (Axon Instruments). The neurotransmitters tested were acetylcholine, GABA, glutamate, glycine, histamine, serotonin, dopamine, nicotine, tyramine and octopamine (Sigma-Aldrich). All neurotransmitters were dissolved in ND96 solution at pH 7.5. HCl or NaOH was added to ND96 to make solutions of varying pH. pH response curves were obtained by exposing oocytes to increasing pH (pH 6–9.5) separated by 30 s to 1 min washes at pH 6. pH response curves were fitted to the Hill equation using Igor Pro software (Wave Metrics) and EC<sub>50</sub> values calculated.

Current–voltage (*I–V*) curves were generated using voltage ramps at 4 mV s<sup>-1</sup>. For each oocyte, a voltage ramp was performed at pH 6 (closed channel) and pH 7.75 (open channel). Current (*I*) values at pH 6 were subtracted from those at pH 7.75 to filter out the activity of endogenous *Xenopus* channels. For ion substitution experiments, the sodium and chloride content in regular ND96 (96 and 103.6 mmol l<sup>-1</sup>, respectively) was reduced to final concentrations of 6 and 13.6 mmol l<sup>-1</sup>, respectively, by replacing sodium chloride with either choline chloride (sodium replacement) or sodium acetate (chloride replacement).

### Fly strains and maintenance

All *Drosophila* strains were maintained at room temperature and raised on a standard diet consisting of dry yeast, corn flour and glucose. *w* served as the wild-type strain. Strains bearing three independent mutant alleles for *pHCl-2* were also used: (i) *w<sup>1118</sup>;Df(3R)Exel16218/TM6B,Tb* [Bloomington *Drosophila* Stock Center (BDSC) no. 7696], referred to as *pHCl-2<sup>Df</sup>*, contains a deletion that removes multiple genes including the entire *pHCl-2* locus, (ii) *w<sup>1118</sup>;Mi{ET1}CG11340<sup>MB03564</sup>* (BDSC no. 23854), referred to as *pHCl-2<sup>Mi</sup>*, contains a *Minos* transposable element inserted in the second exon of *pHCl-2*, and (iii) a deletion in *pHCl-2*, referred to as *pHCl-2<sup>Δ</sup>*, generated in our lab using the FRT (flippase recognition target)-derived deletion technique (Parks et al., 2004; Thibault et al., 2004).

To generate *pHCl-2<sup>Δ</sup>*, FRT-mediated recombination was induced in flies that were trans-heterozygous for two *Piggybac* elements that flanked the *pHCl-2* locus, thereby removing the intervening DNA. The fly strains containing the relevant *Piggybac* elements were *w<sup>1118</sup>;PBac{RB}CG11340<sup>e00225</sup>* (BDSC no. 17827) and *w\*;PBac{WH}CG11340<sup>f00507</sup>* (Exelixis Collection, Harvard Medical School no. f00507). The deletion was confirmed by two-sided PCR (Parks et al., 2004) using the following primers: 5'-TCCAAGCG-GCGACTGAGATG-3', which is specific to the FRT-bearing transgene that remains following the deletion of *pHCl-2* and was used in both PCR reactions, and 5'-CCAGAGAATGTTTCGAGTGACTAC-AGA-3' and 5'-AAACCTGGGTGGGTGGAAAGTG-3', which anneal to genomic DNA proximal to the *e00225* and *f00507* *Piggybac* insertion sites, respectively. The resulting deletion spans 13,980 bp and is predicted to remove all but the first 30 amino acids of the 527 amino acid protein. *pHCl-2* is the only coding DNA predicted to be affected by the resulting deletion.

### Generation of pHCl-2 antiserum

The putative intracellular loop domain was chosen as an antigen for the generation of a pHCl-2-specific antibody because the loop displays the lowest conservation among Cys-loop LGICs (Jones and Sattelle, 2006; Talwar and Lynch, 2014). Using the

primers 5'-TCGCATATGGCCATGGAAACATTTGTCCCACAT-CTGAAG-3' and 5'-TGATGGTGATGAATTCTGGCGAAGGT-CTGCGC-3', we amplified a PCR product from *pT7-pHCl-2* and cloned it into a pGEX2T vector modified to include a 6× His tag (gift from P. Lasko, McGill University) that was predigested with *NcoI* and *EcoRI* using the In-Fusion cloning kit (Clontech). The resulting construct was expressed in BL21 cells and the recombinant protein was purified using His-affinity binding columns (Talon kit, Clontech). The purified pHCl-2 antigen was used to immunize rats.

### Immunohistochemistry

pHCl-2 antiserum was pre-absorbed by incubation with fixed homozygous *pHCl-2<sup>A</sup>* wandering third instar larvae and used at a final concentration of 1:100. Anti-Rat-Alexa Fluor 488 secondary antibody (Invitrogen) was pre-absorbed by incubation with fixed wild-type (Oregon-R) embryos and used at a final concentration of 1:1000. All tissues used for immunostaining were dissected from adult females 3–7 days post-eclosion. Tissues were fixed in 4% (v/v) formaldehyde/PBS for 20 min, followed by two 5 min washes in PBS with 0.3% (v/v) Triton X-100 and one 10 min wash in PBS with 0.1% Triton X-100 (0.1% PBT). Tissues were then blocked in PBS containing 0.1% (v/v) Tween-20 and 1% (w/v) bovine serum albumin (PBST-BSA) for 30–45 min, incubated overnight at 4°C with primary antibody diluted in PBST-BSA, then washed three times for 20 min in 0.1% PBT, and incubated overnight again at 4°C with secondary antibody diluted in PBST-BSA. After three additional 20 min washes

in 0.1% PBT, tissues were incubated with DAPI at 0.5 ng  $\mu\text{l}^{-1}$  in 1× PBS for 5 min followed by a final wash for 20 min in 1× PBS. Unless stated otherwise, all procedures were carried out at room temperature. Tissues were then mounted in a standard mounting medium.

### Malpighian tubule dissection and Ramsay fluid secretion assays

All experiments were conducted with adult females 3–10 days post-eclosion. Malpighian tubule dissections and Ramsay fluid secretion assays were carried out as described previously (Chahine et al., 2012; Dow et al., 1994; O'Donnell and Rheault, 2005). Briefly, pairs of explanted Malpighian tubules were arranged such that one tubule was bathed in a droplet of *Drosophila* saline while the other was positioned outside the droplet to allow for the collection and measurement of secreted fluid at 40 min intervals. Fluid secretion rate (FSR;  $\text{nl min}^{-1}$ ) was calculated by dividing the secreted droplet volume by the amount of time it took for the droplet to form. For the application of cAMP (Sigma-Aldrich), 1.5 min prior to the end of the first 40 min interval, the bathing droplet (18  $\mu\text{l}$ ) was spiked with 2  $\mu\text{l}$  of 2  $\text{mmol l}^{-1}$  cAMP in saline to produce a final concentration of 0.2  $\text{mmol l}^{-1}$  cAMP. The secreted droplet isolated after the first interval was used to calculate baseline FSR and the secreted droplet isolated from the second interval was used to calculate FSR after the addition of cAMP. Mock treatments using *Drosophila* saline alone were done in parallel on separate Malpighian tubules to determine how FSR changed between the two intervals in the absence of drug. In both conditions (mock and

|        |                                                                                                                 |     |
|--------|-----------------------------------------------------------------------------------------------------------------|-----|
| dmRDL  | MSDSKMDKLARMAPLRPTP-----LLTIWLAINMALIAQETGHKRIHTVQAATGG                                                         | 50  |
| pHCl-2 | MDTLGIFVLIISYLGSSAAGVHLGDLQQLNLAANGSVVVSPLNTTDAFVSINLSQSAVNN                                                    | 60  |
|        | *. : * * . : . * : : * : * : * . .                                                                              |     |
| dmRDL  | GSMLGDVNIISAILDSFS-----VSYDKRVRPNYGGP-----PVEVGVMTMYVLSISLSEV                                                   | 100 |
| pHCl-2 | CPSLKNAESMALMELLRLTA <sup>S</sup> CRYDRMVPV <sup>V</sup> VHNKDGEEVPM <sup>D</sup> IYARFYIYVMKNLDS               | 120 |
|        | . * : : * : : : * : * * . * : : * : : * : : * . .                                                               |     |
|        | .....Lp D.....Lp A.....                                                                                         |     |
| dmRDL  | KMDFTLDFYFRQWTDPRLAYR-KRPGVETLSVG-SEFIKNIWVVPDFFVNEKQSYFHIA                                                     | 158 |
| pHCl-2 | DLQFTVQGLLQLRLYLDPRLAFSSYL <sup>N</sup> RRQPI <sup>M</sup> GESELK <sup>M</sup> LWVPH <sup>I</sup> FLTNEQASTVLGT | 180 |
|        | .. : * : : : : * : * * * : * : * * * : * : * * * : * : * . .                                                    |     |
|        | .....Lp E.....Lp B.....                                                                                         |     |
| dmRDL  | TTSNEFIRVHSGSITRSIRLTITASCPMNLQYFPMDRQ <sup>L</sup> CHIEIESFGYTMRDIRYKWN                                        | 218 |
| pHCl-2 | SAKDELTSIYPNGTVLSTRLQATL <sup>C</sup> W <sup>M</sup> NFQKFPFDEQ <sup>K</sup> KT <sup>T</sup> LESWMYNTTLVQLHWE   | 240 |
|        | .. : * : * : : * : * * * * * * * * * * * * * * * * * * : * : * : : * : :                                        |     |
|        | .....Lp F.....Lp C.....M1                                                                                       |     |
| dmRDL  | EGPNSVGVSSVSLPQFKVLG-----HRQRAMEISLTTGNYSRLACEIQFVRSMGY                                                         | 269 |
| pHCl-2 | TD-NPVSFDKQLQLTEYNLIGSLYNESIRVSNESYMSHGSLEGNYSIISFTVLLTREVGY                                                    | 299 |
|        | . * . * . . . . . * : : : * : : * . . * * * * : : : * : * : * * :                                               |     |
|        | .....M1.....M2.....                                                                                             |     |
| dmRDL  | YLIQIYIPSGLIV <sup>I</sup> ISWVSFWLNRNATPARVALGVTTVLTMTTLMSS <sup>T</sup> NAALPKISYVKS                          | 329 |
| pHCl-2 | YVIDYFLPSIMIVTISWVSFWLQADQTPARTTLGCTTLLSFTLSLSQENNLKVS <sup>Y</sup> VTM                                         | 359 |
|        | * : * : : * * * * * * * * * * * * * * * * * * * * * * * * * * * * * * * :                                       |     |
|        | .....M3.....                                                                                                    |     |
| dmRDL  | IDVYLGTCFVMV <sup>F</sup> ASLLEYATVGYMAKRIQMRKQRFMAIQKIAEQKKQLDGANQQANP                                         | 389 |
| pHCl-2 | SEVWFLVCTIFIFGSLVEFAFVNTIWRNNDLQLKRTTKYIVK <sup>S</sup> -----                                                   | 404 |
|        | : * : : * : : * * * * * * * . : * : : : : : : : * . .                                                           |     |
| dmRDL  | NPNAVGGPGGVGPGGPGGPGG <sup>V</sup> NVGVMGMGPEHGHGHGHHAHSHGHHPAPKQTVS                                            | 449 |
| pHCl-2 | -----TFVPHLKKHRRHGYRRTDSTMSTMS                                                                                  | 429 |
|        | . * : * : * : * : : . . . . * : *                                                                               |     |
| dmRDL  | NRPIGFSNIQQNVGTRGCSIVGPLFQEVRFKVHDPKAHSGGTTLENTVNGGRGGPQSHGP                                                    | 509 |
| pHCl-2 | T-----TSMDKTCGPNNVTIT-----IETPIIIIGSLSREDSAISLDEQDETS--                                                         | 472 |
|        | . : : : : * . . * . : . * . . : * : : . : :                                                                     |     |
| dmRDL  | GPGQGGGPPGGGGGGGGGGP <sup>E</sup> GGGDPEAAVPAHLLHPGKVKKDINKLLGITPSDIDKY                                         | 569 |
| pHCl-2 | -----TSESSDSSKEKPAQTFATMTTPEKVS-----LWIDRK                                                                      | 503 |
|        | . . . . * . . * : : . . * : * :                                                                                 |     |
|        | .....M4.....                                                                                                    |     |
| dmRDL  | SRIVFVCFVCFNL <sup>M</sup> YWI <sup>I</sup> YLHVSDV <sup>V</sup> VADDLVLLGEE                                    | 606 |
| pHCl-2 | MRFVFLPSFIVFNALFWTLVY <sup>C</sup> L-----                                                                       | 526 |
|        | * : * * : * : * * : * : * : :                                                                                   |     |

**Fig. 1. *pHCl-2* encodes a protein that contains the features of a typical Cys-loop ligand-gated ion channel (LGIC) subunit.** Amino acid alignment of *pHCl-2* with the *Drosophila* RDL Cys-loop LGIC subunit. The two cysteines that form the Cys-loop are indicated by rectangles. M1–M4 transmembrane domains are marked with solid lines. The six loops (Lp A–F) associated with ligand binding are indicated with a dotted line. The two polymorphisms identified for *pHCl-2* are indicated in red. Notations \*, : and . represent the degree of conservation in descending order.

cAMP), the second interval FSR was normalized to the first interval FSR to quantify the relative change in secretion after treatment. The actual response to cAMP (presented in Results) was calculated by dividing all the normalized FSR values in the cAMP trials by the average normalized FSR in mock conditions.

### Statistical analysis

All data are presented as the mean±s.e.m. Where required, data were analysed by the Mann–Whitney rank sum test with  $P=0.05$  as the threshold for significance. Comparisons of the cAMP response between genotypes presented below were analysed by one-way ANOVA followed by a Tukey's *post hoc* test.

## RESULTS

### pHCl-2 forms a homomeric pH-sensitive chloride channel

The cDNA of *pHCl-2* was isolated from wild-type (Oregon-R) adult flies. Analysis of the corresponding protein sequence confirmed the presence of all the functional domains typical of a pLGIC subunit (Fig. 1). To determine whether the protein encoded by *pHCl-2* forms a functional ion channel, we expressed it in *Xenopus* oocytes and looked for changes in membrane conductance in response to putative ligands. Oocytes expressing *pHCl-2* did not respond to  $1\text{ mmol l}^{-1}$  acetylcholine, GABA, glutamate, glycine, histamine, serotonin, dopamine, nicotine, tyramine or octopamine (data not shown). Based on the homology of *pHCl-2* to a class of pH-gated Cys-loop LGICs in *D. melanogaster* (*pHCl*) and *Sarcoptes scabiei* (*SsCl*) (Mounsey et al., 2007; Schnizler et al., 2005), we also tested the effects of pH on the activity of the putative pHCl-2 channel. Similar to the previously characterized pH-gated channels, oocytes expressing *pHCl-2* and clamped at  $-80\text{ mV}$  displayed a pH-dependent inward current that was not detected in water-injected oocytes, suggesting that pHCl-2 forms a functional homomeric, pH-sensitive channel (Fig. 2A). The pHCl-2 channel was closed at pH 6 and displayed a maximal saturating response at pH 8.75 with an  $EC_{50}$  pH of  $7.84\pm 0.01$  and a Hill coefficient of  $2.32\pm 0.15$  (Fig. 2B).

pHCl-2 contains a proline-alanine-arginine motif just upstream of the M2 domain, followed by a threonine 12 amino acids downstream in the M2 (see Fig. 1) that collectively have been shown to be highly predictive of anion selectivity (Galzi et al., 1992; Gunthorpe and

Lummiss, 2001). To confirm the ion selectivity of the pHCl-2 channel directly, we generated  $I-V$  curves. In regular ND96 medium ( $98\text{ mmol l}^{-1}\text{ Na}^+$  and  $103.6\text{ mmol l}^{-1}\text{ Cl}^-$ ), the reversal potential of the current through the pHCl-2 channel was  $-44.02\pm 0.94\text{ mV}$  (Fig. 2C). When the extracellular chloride was reduced to  $16\text{ mmol l}^{-1}$  (including  $2.6\text{ mmol l}^{-1}\text{ Cl}^-$  from the HCl used to titrate pH), the reversal potential was shifted positively to  $-2.83\pm 0.82\text{ mV}$ , which is consistent with a  $47\text{ mV}$  shift predicted by the Nernst equation (Fig. 2C). When the extracellular sodium was reduced to  $6\text{ mmol l}^{-1}$ , the reversal potential was  $-43.31\pm 1.07\text{ mV}$ , representing a negligible shift compared with the regular ND96 condition (Fig. 2C). Collectively, these results demonstrate that pHCl-2 is a chloride channel.

### pHCl-2 is expressed in secretory tissues

Although pLGICs are typically expressed throughout the nervous system and in muscle cells, where they mediate fast, ionotropic synaptic transmission (Sine and Engel, 2006), previously generated gene expression assays have not detected *pHCl-2* expression in the nervous system, but instead have identified expression enriched in the midgut and Malpighian tubules (Chintapalli et al., 2007; Graveley et al., 2011; Remnant et al., 2016). Using polyclonal antibodies raised against the poorly conserved M3–M4 intracellular loop of pHCl-2, we confirmed that the pHCl-2 protein is expressed in the Malpighian tubules. pHCl-2 immunostaining was detected in the primary cell type, the principal cells (Fig. 3A, arrows), but not in the smaller, less abundant stellate cells (Fig. 3A, arrowheads). Within the principal cells, pHCl-2 displayed a polarized distribution with immunostaining localized to the apical (lumen-facing) plasma membranes (Fig. 3B, arrows). Moreover, the principal cell-specific staining observed was absent from the Malpighian tubules of flies lacking a wild-type copy of *pHCl-2* (*pHCl-2<sup>A</sup>/pHCl-2<sup>A</sup>*, *pHCl-2<sup>A</sup>/pHCl-2<sup>Mi</sup>* and *pHCl-2<sup>Mi</sup>/pHCl-2<sup>Mi</sup>*), thus confirming that this signal corresponds to pHCl-2 protein (Fig. 3C–E). We also saw primary antibody-dependent punctate staining in the mutant Malpighian tubules that we interpret as non-pHCl-2 staining. We could not confirm pHCl-2 expression in the midgut with this antiserum, because we were unable to distinguish between pHCl-2 staining in wild-type and *pHCl-2<sup>A</sup>/pHCl-2<sup>A</sup>* tissue (data not shown).

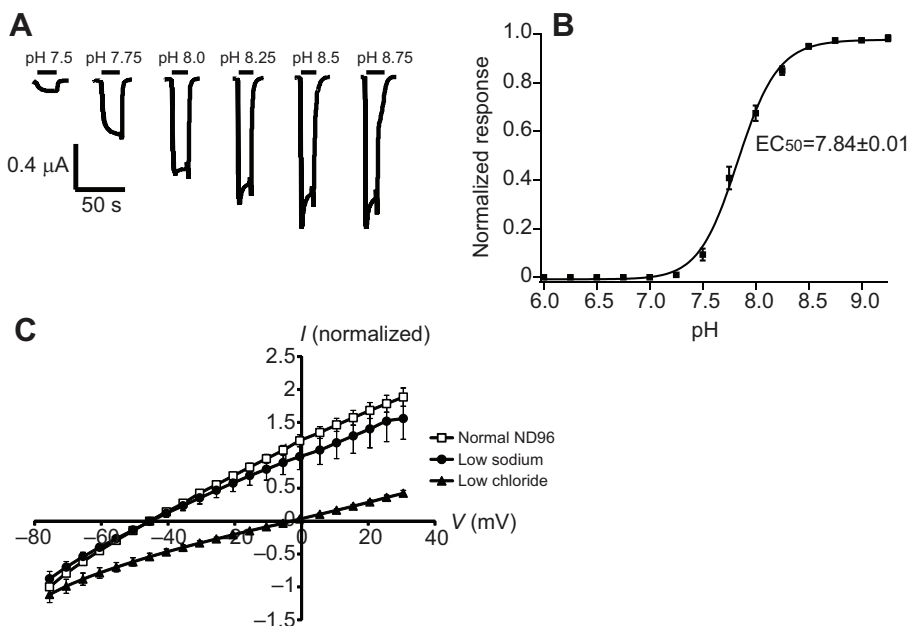

**Fig. 2. pHCl-2 forms a homomeric pH-sensitive chloride channel.** (A) Representative trace from oocytes expressing *pHCl-2* and clamped at  $-80\text{ mV}$ , showing responses to changes in pH. Oocytes were washed in ND96 at pH 6 to close the channel between successive pH treatments. (B) Trace showing the response profile of the channel to changes in pH. The responses were normalized to the maximum current generated by each individual oocyte. The curve represents a fit to the Hill equation ( $N=7$ ). (C) Representative trace of the current ( $I$ )–voltage ( $V$ ) relationship under 'normal' ( $96\text{ mmol l}^{-1}\text{ Na}^+$  and  $103.6\text{ mmol l}^{-1}\text{ Cl}^-$ ;  $N=8$ ), low extracellular sodium ( $6\text{ mmol l}^{-1}\text{ Na}^+$  and  $103.6\text{ mmol l}^{-1}\text{ Cl}^-$ ;  $N=4$ ) and low extracellular chloride ( $96\text{ mmol l}^{-1}\text{ Na}^+$  and  $16\text{ mmol l}^{-1}\text{ Cl}^-$ ;  $N=6$ ) conditions. In B and C, error bars represent  $\pm$ s.e.m.

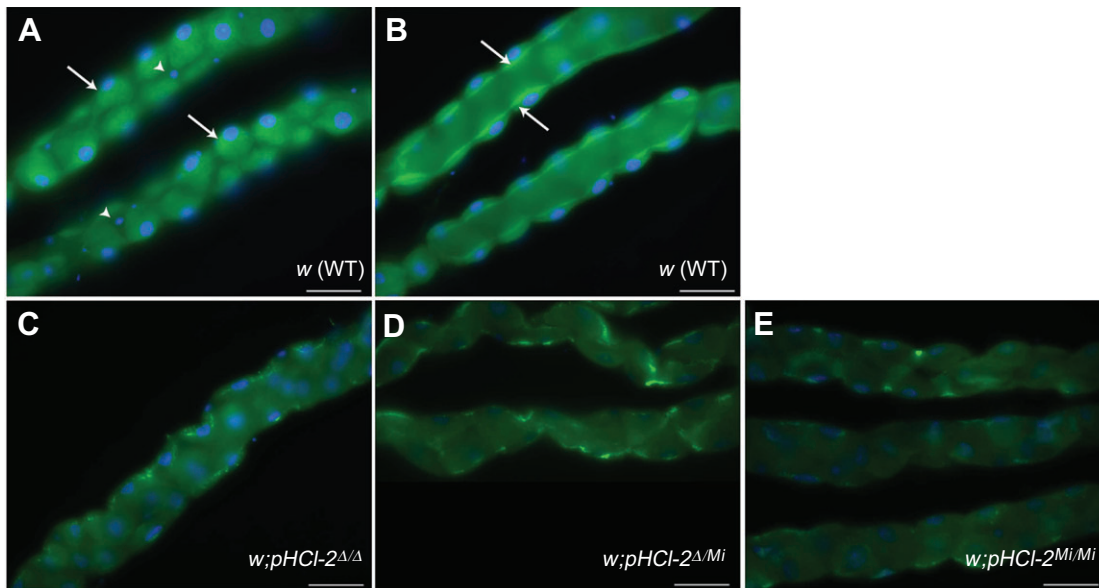

**Fig. 3. pHCl-2 expression patterns.** Immunostaining of adult Malpighian tubules using anti-pHCl-2 antibody (green). Nuclei are labelled with DAPI (blue). (A) Surface view of a wild-type Malpighian tubule showing pHCl-2 expression in principal cells (arrows), but not stellate cells (arrowheads). (B) Cross-sectional view of the same tissue as in A, showing expression of pHCl-2 localized to the apical membrane of principal cells (arrows). (C) The apical membrane-specific signal observed in the principal cells of wild-type Malpighian tubules is absent in homozygous *pHCl-2 $\Delta$*  Malpighian tubules as well as in the heteroallelic *pHCl-2 $\Delta$ /pHCl-2 $^{Mi}$*  (D) and homozygous *pHCl-2 $^{Mi}$*  (E) mutant Malpighian tubules. Scale bars for A–E are 50  $\mu$ m.

### pHCl-2 regulates fluid secretion in the Malpighian tubules

Insect Malpighian tubules are functionally similar to the vertebrate kidney and serve to maintain osmotic homeostasis in various insect orders (Phillips, 1981). In *Drosophila*, the Malpighian tubules consist of two pairs of blind-ended tubes that filter the haemolymph and form the primary urine. The Malpighian tubules are made up of two main cell types, the principal cells, which mediate the transcellular secretion of  $\text{Na}^+$  and  $\text{K}^+$ , and the stellate cells, which contribute to  $\text{Cl}^-$  secretion (Blumenthal, 2003; Cabrero et al., 2014; O'Donnell et al., 1996, 1998). In *Drosophila*, as in other insects, transepithelial secretion is an active process powered by an electrogenic V-type proton ATPase located in the apical membrane of the principal cells (Beyenbach, 1995; Du et al., 2006; Maddrell and O'Donnell, 1992; Torrie et al., 2004; Weng et al., 2003). The ATPase extrudes  $\text{H}^+$  into the tubule lumen, generating a net lumen positive transepithelial potential (TEP). Protons are returned to the cytoplasm via apically localized proton/alkali metal antiporters in exchange for  $\text{Na}^+$  and  $\text{K}^+$ , which are, as a

result, exported into the tubule lumen. Chloride and water enter the lumen passively, flowing down their respective electrochemical and osmotic gradients (see Fig. 4). Chloride secretion is critical for the production of urine because it serves as the main negative counterion that reduces the magnitude of the positive TEP, thus allowing continued activity of the electrogenic proton ATPase and further development of an osmotic gradient (Beyenbach et al., 1993; O'Donnell et al., 1996).

Given its expression in the Malpighian tubules and the importance of transepithelial chloride transport to urine production, we asked whether disrupting pHCl-2 function alters fluid secretion rate (FSR) in the Malpighian tubules. We used the Ramsey assay, which directly measures urine production in explanted Malpighian tubules (Dow et al., 1994), to compare FSRs from wild-type and three different *pHCl-2* heteroallelic combinations: *pHCl-2 $\Delta$ /pHCl-2 $\Delta$* , *pHCl-2 $\Delta$ /pHCl-2 $^{Df}$*  and *pHCl-2 $\Delta$ /pHCl-2 $^{Mi}$* . In standard *Drosophila* saline, wild-type Malpighian tubules spontaneously secreted fluid at  $0.45 \pm 0.01 \text{ nl min}^{-1}$  and

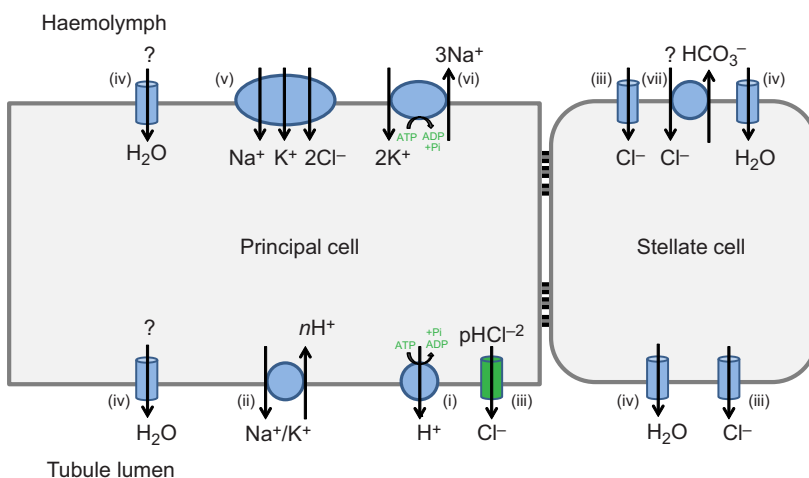

**Fig. 4. General model of transepithelial secretion in the Malpighian tubules.** Transepithelial secretion is powered by an electrogenic vacuolar-type proton ATPase ( $\text{H}^+$ -ATPase; i) located in the apical membrane of the principal cells. The  $\text{H}^+$ -ATPase extrudes  $\text{H}^+$  into the tubule lumen, generating a net lumen positive transepithelial potential.  $\text{H}^+$  ions are returned to the cytoplasm via apically localized  $\text{Na}^+/\text{K}^+-\text{H}^+$  antiporters (ii) in exchange for the export of  $\text{Na}^+$  and  $\text{K}^+$ . Chloride enters the lumen passively, following a favourable electrochemical gradient, via apically localized chloride channels (iii) and water enters the lumen through aquaporins (iv), following the osmotic gradient generated as a consequence of net ion transport. At the basolateral membrane of principal cells,  $\text{Na}^+$ ,  $\text{K}^+$  and  $\text{Cl}^-$  enter the cell via  $\text{Na}^+:\text{K}^+:2\text{Cl}^-$  co-transporters (v). The activity of a  $\text{Na}^+/\text{K}^+$ -ATPase (vi) recycles most of the  $\text{Na}^+$  that enters the cell back to the haemolymph. Chloride also enters stellate cells from the haemolymph via basolaterally localized chloride channels (iii) and may also enter stellate cells via a  $\text{Cl}^-/\text{HCO}_3^-$  antiporter (vii).

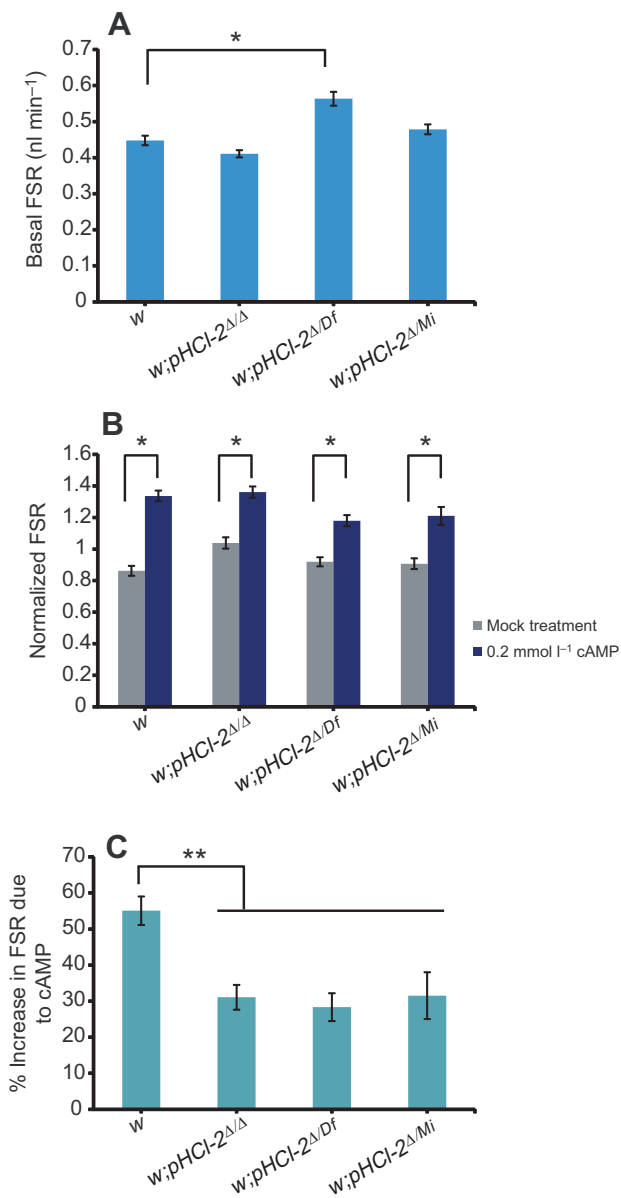

**Fig. 5. Loss of *pHCl-2* reduces the cAMP-mediated diuretic response.** Fluid secretion assays were conducted on *w*, *w;pHCl-2<sup>Δ</sup>/pHCl-2<sup>Δ</sup>*, *w;pHCl-2<sup>Δ</sup>/pHCl-2<sup>Df</sup>* and *w;pHCl-2<sup>Δ</sup>/pHCl-2<sup>Mi</sup>*. (A) Basal fluid secretion rate (FSR) over 40 min in regular saline for *w* ( $N=149$ ), *w;pHCl-2<sup>Δ</sup>/pHCl-2<sup>Δ</sup>* ( $N=116$ ), *w;pHCl-2<sup>Δ</sup>/pHCl-2<sup>Df</sup>* ( $N=41$ ) and *w;pHCl-2<sup>Δ</sup>/pHCl-2<sup>Mi</sup>* ( $N=56$ ). (B) Change in FSR in response to 0.2 mmol l<sup>-1</sup> cAMP or regular saline (mock treatment) relative to the first interval (see Materials and methods). Sample size (mock/cAMP treatments): *w*,  $N=67/82$ ; *w;pHCl-2<sup>Δ</sup>/pHCl-2<sup>Δ</sup>*,  $N=58/58$ ; *w;pHCl-2<sup>Δ</sup>/pHCl-2<sup>Df</sup>*,  $N=19/22$ ; and *w;pHCl-2<sup>Δ</sup>/pHCl-2<sup>Mi</sup>*,  $N=27/29$ . (C) Percentage increase in FSR following treatment with 0.2 mmol l<sup>-1</sup> cAMP calculated as the ratio of the mock and cAMP responses indicated in B (see Materials and methods). In all panels, error bars represent  $\pm$ s.e.m. \* $P<0.001$  (Mann–Whitney rank sum test) and \*\* $P<0.05$  (one-way ANOVA Tukey's *post hoc* test).

*pHCl-2<sup>Δ</sup>/pHCl-2<sup>Δ</sup>*, *pHCl-2<sup>Δ</sup>/pHCl-2<sup>Df</sup>* and *pHCl-2<sup>Δ</sup>/pHCl-2<sup>Mi</sup>* Malpighian tubules secreted fluid at  $0.41\pm 0.01$ ,  $0.56\pm 0.02$  and  $0.48\pm 0.01$  nl min<sup>-1</sup>, respectively (Fig. 5A). While the FSRs from *pHCl-2<sup>Δ</sup>/pHCl-2<sup>Δ</sup>* Malpighian tubules appeared to be slightly reduced compared with wild-type, this difference was not significant ( $P=0.138$ , Mann–Whitney rank sum test). FSRs between *pHCl-2<sup>Δ</sup>/pHCl-2<sup>Mi</sup>* Malpighian tubules and wild-type were also not significantly different ( $P=0.061$ ), and, in fact, FSRs

from *pHCl-2<sup>Δ</sup>/pHCl-2<sup>Df</sup>* Malpighian tubules were significantly higher than wild-type ( $P<0.001$ ; Fig. 5A). As Malpighian tubules lacking a functional *pHCl-2* gene show no consistent change in spontaneous FSRs, *pHCl-2* is not a primary source of chloride conductance for basal secretion, consistent with the presence of additional sources of chloride conductance. Indeed, the major route of chloride entry into the lumen of *Drosophila* Malpighian tubules has been proposed to be through chloride channels in the apical membranes of stellate cells, not the principal cells where *pHCl-2* is expressed (Cabrero et al., 2014; O'Donnell et al., 1998). Chloride may also enter the tubule lumen paracellularly, via septate junctions, as has been demonstrated in the Malpighian tubules of *Aedes aegypti* (Beyenbach and Piermarini, 2011; Beyenbach et al., 2009; Miyauchi et al., 2013). More subtle effects of loss of *pHCl-2* on secretion rate may also be obscured by variability among strains, possibly resulting from variations in genetic background.

### Mutations in *pHCl-2* reduce the diuretic effect of cAMP

Given the apparently normal levels of fluid secretion produced by *pHCl-2* mutant Malpighian tubules, we reasoned that increasing the rate of cation transport, which would increase the need for chloride transport to the lumen, might reveal more subtle deficits in chloride conductance in *pHCl-2* mutant tissues. Transepithelial cation transport in the Malpighian tubules can be stimulated with the second messenger cAMP, which increases fluid secretion by enhancing the output of the V-type H<sup>+</sup>-ATPase (Cabrero et al., 2002; Coast et al., 2001; Johnson et al., 2005). Measuring FSR in the same tubule before and after cAMP treatment also allowed us to normalize the variability among tubules.

To test the effect of disrupting *pHCl-2* on Malpighian tubule output when cation transport is stimulated, we compared the FSRs of wild-type and *pHCl-2* mutant Malpighian tubules treated with cAMP. Addition of 0.2 mmol l<sup>-1</sup> cAMP significantly raised the mean FSR in wild-type as well as in *pHCl-2<sup>Δ</sup>/pHCl-2<sup>Δ</sup>*, *pHCl-2<sup>Δ</sup>/pHCl-2<sup>Df</sup>* and *pHCl-2<sup>Δ</sup>/pHCl-2<sup>Mi</sup>* mutant Malpighian tubules (Fig. 5B;  $P<0.001$ , Mann–Whitney rank sum test), suggesting that the H<sup>+</sup>-ATPase activity can be enhanced in both wild-type and *pHCl-2* mutant Malpighian tubules. However, the *pHCl-2* mutant Malpighian tubules displayed a significantly smaller normalized diuretic response to cAMP compared with wild-type. FSRs in wild-type Malpighian tubules increased by  $55.1\pm 3.97\%$ , while *pHCl-2<sup>Δ</sup>/pHCl-2<sup>Δ</sup>*, *pHCl-2<sup>Δ</sup>/pHCl-2<sup>Df</sup>* and *pHCl-2<sup>Δ</sup>/pHCl-2<sup>Mi</sup>* Malpighian tubule FSRs only increased by  $31.1\pm 3.43\%$ ,  $28.3\pm 3.84\%$  and  $31.5\pm 6.48\%$ , respectively (Fig. 5C;  $P<0.05$ , one-way ANOVA followed by Tukey's *post hoc* test). These results, therefore, are consistent with the presence of a *pHCl-2*-mediated chloride conductance that is capable of influencing FSRs in the Malpighian tubules.

### DISCUSSION

pLGICs constitute a large and diverse superfamily of structurally related subunit proteins in metazoans. The vast majority of pLGICs are involved in rapid ionotropic synaptic transmission, opening in response to small molecule neurotransmitters. In this study, however, we demonstrate that *pHCl-2* functions as a pH-gated ion channel, and propose that it serves a non-canonical biological function: regulation of fluid secretion in epithelial tissues by modulating the chloride permeability of apical membranes in response to extracellular pH. The role of *pHCl-2* in the Malpighian tubules thus represents a new biological context under which pLGICs function to regulate membrane ion permeability.

### **pHCl-2 belongs to a highly divergent clade of pH-gated pLGICs common to arthropods**

Previous phylogenetic analysis identified pHCl-2 as a member of an arthropod-specific clade of divergent orphan Cys-loop pLGICs. In *Drosophila*, pHCl-2 groups with two other orphan pLGIC subunits, CG7589 and CG6927 (Dent, 2006; Jones and Sattelle, 2006; Remnant et al., 2016), which together most closely resemble the *Drosophila* pH-sensitive chloride channel (pHCl) and the pH-sensitive chloride channel in *S. scabiei* (SsCl) (Mounsey et al., 2007; Schnizler et al., 2005). Clades of channel subunits orthologous to the clade of subunits defined by pHCl-2, CG7589 and CG6927 have been reported in other insects such as *Apis mellifera*, *A. aegypti*, *Nasonia vitripennis* and *Tribolium cataneum* (Jones and Sattelle, 2006, 2007; Jones et al., 2010; Remnant et al., 2016; www.flybase.org) and in non-insect arthropods such as the deer tick *Ixodes scapularis* (www.flybase.org), but not in nematodes, molluscs, annelids or chordates (Dent, 2006). The pH response of pHCl-2 closely resembles that of the two other characterized pH-sensitive arthropod pLGICs, *Drosophila* pHCl and *Sarcoptes* SsCl; both pHCl and SsCl are inhibited by protons and are increasingly activated by a rise in alkalinity, exhibiting half-maximal activity at pH  $7.33 \pm 0.16$  and  $7.55 \pm 0.06$ , respectively (Mounsey et al., 2007; Schnizler et al., 2005). In contrast, the other well-characterized pH-gated pLGICs identified to date, the PBO-5,6 heteromeric cation channel in *C. elegans* and GLIC from cyanobacterium *G. violaceus*, are inhibited by alkaline conditions, and instead, are increasingly activated by a rise in proton concentration, displaying half-maximal responses at pH  $6.83 \pm 0.01$  and  $5.1 \pm 0.1$ , respectively (Beg et al., 2008; Bocquet et al., 2007). While we have shown that standard neurotransmitters do not gate pHCl-2 channels expressed in oocytes, we cannot rule out that pHCl-2 channels are sensitive to other ligands that might be found in gastric fluid or urine.

### **pHCl-2-mediated chloride conductance regulates fluid secretion in the Malpighian tubules during diuresis**

Fluid secretion in the Malpighian tubules is mediated by active transepithelial ion transport, which establishes the osmotic gradient necessary for the formation of the primary urine. This active transport is powered by an apically localized, electrogenic  $H^+$ -ATPase that pumps protons into the tubule lumen and generates a net positive apical membrane potential. The proton gradient is used to drive alkali metal cation/ $H^+$  antiporters, which replace luminal protons with sodium and potassium. Chloride enters the lumen passively, following its electrochemical gradient, and is a critical regulator of secretion because, in the absence of this negative counter-ion, cation transport into the lumen would result in an increasingly positive apical membrane potential, which would oppose transport by the ATPase before a significant osmotic gradient has formed.

A role for pHCl-2 as an important source of chloride conductance in the Malpighian tubules is supported by our observation that urine production is affected in *pHCl-2* mutants. Loss of *pHCl-2* did not obviously impair fluid secretion in unstimulated Malpighian tubules, consistent with alternative routes of chloride flow into the lumen, either via known channels in the stellate cells or through a putative paracellular route via septate junctions (Beyenbach and Piermarini, 2011; Beyenbach et al., 2009; Cabrero et al., 2014; O'Donnell et al., 1998). However, upon stimulation of the Malpighian tubules with cAMP, a second messenger that enhances the output of the  $H^+$  ATPase, *pHCl-2* mutant Malpighian tubules showed a

significantly reduced diuretic response compared with wild-type. These data suggest that under conditions of enhanced cation transport into the lumen, pHCl-2 provides a necessary source of chloride conductance in the principal cells, without which maximal secretion rates are not achieved.

### **A possible role for pH as a regulator for chloride permeability in the Malpighian tubules**

The expression of *pHCl-2* in the apical membrane of principal cells, together with our electrophysiology data demonstrating that pHCl-2 forms a pH-sensitive channel, suggests that the pHCl-2-mediated chloride conductance may be regulated by the pH of the luminal environment. Luminal pH is strongly influenced by the relative activities of the proton ATPase and the cation/ $H^+$  antiporter, which transport protons into and out of the tubule lumen, respectively (Day et al., 2008; Dow et al., 1994; Linton and O'Donnell, 1999; Maddrell and O'Donnell, 1992; Nicolson, 1993; O'Donnell and Maddrell, 1995; Petzel et al., 1999) and we propose that the gating of pHCl-2 by pH may reveal a homeostatic mechanism that maintains an appropriate balance between these two cation transporters. Under conditions where the activity of the ATPase is high relative to the antiporter, the pH of the lumen would drop because the rate of proton transport into the lumen would exceed proton removal by the antiporter. As secondary active transport of sodium and potassium into the tubule lumen by the antiporter is coupled to active proton transport, an accumulation of excess protons in the tubule lumen would reflect a decrease in the energy efficiency of sodium and potassium secretion. We propose that the presence of a pH-sensitive chloride channel like pHCl-2 would counteract such an imbalance. If the pH of the lumen were too acidic, pHCl-2 would be antagonized, chloride permeability would become rate limiting for secretion and the increasingly positive apical membrane potential generated by the electrogenic ATPase would oppose further transport of protons into the lumen. The proton gradient, however, would continue to drive the antiporter, increasing luminal pH, which would, in turn, increase pHCl-2 conductance, and decrease the electrical barrier opposing the ATPase, thus re-establishing homeostasis. pHCl-2 would therefore serve as a 'brake' on the  $H^+$ -ATPase, providing an upper limit to which the ATPase can operate relative to the antiporter, thus minimizing the expenditure of ATP under conditions where protons are not being put to metabolically efficient use.

If pHCl-2 is in fact inhibited by acidic luminal pH, then one might predict that the stimulatory effects of cAMP on the  $H^+$ -ATPase would lead to inhibition of pHCl-2-mediated chloride conductance. cAMP signalling in the Malpighian tubules leads to the secretion of a more acidic urine, with pH decreasing from 7.8 to 7.4, consistent with an increase in proton transport by the ATPase (Coast et al., 2001; O'Donnell et al., 1996). Based on its pH sensitivity in oocytes, the chloride conductance of pHCl-2 channels should decrease ~80% in response to cAMP, and the normalized chloride conductance-limited secretion rate increase should be significantly smaller in the presence of a pH-sensitive channel (i.e. wild-type) than in its absence (i.e. *pHCl-2* knockout). Yet, we observed the opposite – the normalized response of secretion to cAMP in the *pHCl-2* knockout was smaller than in wild-type, indicating that a simple physiological model does not account for the *pHCl-2* phenotype. Instead, the *pHCl-2* knockout may have indirect feedback effects on lumen pH or membrane potential, for example by directly affecting the ability of the  $H^+$ -ATPase to respond to cAMP.

Another effect of down-regulating pHCl-2 may be to increase the relative chloride current through stellate cell chloride channels. Decreased luminal pH that inhibits pHCl-2, resulting in a rise in apical membrane potential, should increase the driving force for chloride through apically localized chloride channels in stellate cells, thus increasing the relative contribution of stellate cells to apical chloride current. The increased activity of stellate cell chloride channels could in turn drive anion exchange via the basal membrane-localized  $\text{Cl}^-/\text{HCO}_3^-$  transporter in stellate cells, thereby alkalinizing the haemolymph. Interestingly, pharmacological block of the  $\text{Cl}^-/\text{HCO}_3^-$  transporter in *A. aegypti* has little effect on resting secretion rate but inhibits stimulated secretion, similar to the *pHCl-2* mutant phenotype (Piermarini et al., 2010). As  $\text{HCO}_3^-$  is thought to be produced by carbonic anhydrase in the principal cells and enter the stellate cells through intracellular junctions, the effect of the *pHCl-2* mutant on stimulated transport may be an indirect effect on the  $\text{Cl}^-/\text{HCO}_3^-$  balance in principal cells feeding back and affecting chloride transport through stellate cells.

Recent work by Remnant et al. (2016) demonstrated that *pHCl-2* is expressed in the copper cells of the midgut and influences sensitivity to dietary copper: flies deficient for *pHCl-2* display increased copper tolerance, whereas the opposite is observed when *pHCl-2* is over-expressed. Copper cells are the principal site of acid secretion in the midgut, and, like the Malpighian tubules, are thought to transport protons via apically localized V-type  $\text{H}^+$ -ATPases (Dubreuil, 2004; Shanbhag and Tripathi, 2005). While a clear relationship between  $\text{H}^+$ -ATPase output and copper uptake has yet to be elucidated, it has been shown that copper uptake is impaired in flies whose copper cells are deficient in acid secretion, and that the copper cell midgut region is less acidic following copper feeding (Dubreuil, 2004; McNulty et al., 2001). Similar to our proposed model in the Malpighian tubules, pHCl-2 may influence ATPase output in copper cells by regulating chloride counter-ion availability, which, in turn, could affect the rate of copper uptake. Curiously, the role of pHCl-2 both in the Malpighian tubules and in the copper cells points to a somewhat counter-intuitive physiological model in which the activity of an alkaline-gated chloride channel provides the necessary counter-current for an acid-secreting transporter.

### pHCl-2 function in the Malpighian tubules points to an expanded role for Cys-loop pLGICs

Our demonstration that pHCl-2 regulates secretion in the Malpighian tubules, a polarized epithelial tissue that is not directly associated with the nervous system, underscores the ability of pLGICs to function in a wide array of biological contexts beyond their canonical function in the nervous system. Previous work, for instance the discovery of pLGIC-like proteins in bacteria (Tasneem et al., 2005), has also hinted at possible roles for this ion channel superfamily that are entirely independent of neuronal signalling. There are also examples of pLGICs with well-characterized roles in the nervous system that appear to function in non-neuronal tissues. For example, the mammalian immune system is rich in pLGICs, including nicotinic acetylcholine (nACh),  $\text{GABA}_A$  and glycine receptors (Barragan et al., 2015; Borovikova et al., 2000; Dionisio et al., 2011; Froh et al., 2002; Prud'homme et al., 2015; Rosas-Ballina et al., 2011; Tracey, 2002). While such non-neuronal roles of the GABA and glycine receptors are poorly understood, the  $\alpha 7$  nicotinic acetylcholine receptor (nAChR) is expressed in macrophages where it regulates tumour necrosis factor- $\alpha$  in response to acetylcholine released from spleen lymphocytes (Rosas-Ballina et al., 2011). nAChR function has also been reported in bronchial epithelia, where

nAChRs expressed on the apical membrane (Maus et al., 1998) respond to non-neuronal autocrine/paracrine ACh release to regulate chloride permeability through the cystic fibrosis transmembrane conductance regulator (CFTR) channel (Maouche et al., 2013). Non-neuronal roles for nAChRs have also been identified in vascular endothelia (reviewed in Egleton et al., 2009), in urothelia (Zarghooni et al., 2007) and in keratinocytes (Grando et al., 1995).

pHCl-2 represents an extreme in the evolution of pLGIC functions. Like epithelial nAChRs, it is expressed in non-innervated tissues, but pHCl-2 is unique in that it is not obviously responding to an autocrine/paracrine signal. Whether pHCl-2 has an additional function in the nervous system remains unclear; microarray data suggest that it is not expressed in the head, brain and eyes of adult flies, or in the larval central nervous system (Chintapalli et al., 2007), but this broad survey would not necessarily detect expression in a small subset of neurons. Additionally, although we see pHCl-2 localized to the apical membrane of principal cells, we cannot rule out the possibility that it functions in apically enriched endosomal vesicles to regulate secretion, similar to CUP-4 in *C. elegans*, which is localized to endosomes and is necessary for endosomal trafficking, although its activating ligand, if any, is unknown (Patton, 2005). Nevertheless, whether it acts in endosomes or the apical membrane, our characterization of pHCl-2 illustrates the remarkable ability of the pLGICs to evolve diverse physiological functions.

### Acknowledgements

The authors would like to thank Josée Houde for her assistance with immunostaining, Saima Sidik for helping generate the *pHCl-2<sup>d</sup>* allele and Dr John Sakata for assisting with data analysis. The authors would also like to thank Emily Remnant for engaging in open dialogue about ongoing work on *CG11340/pHCl-2*.

### Competing interests

The authors declare no competing or financial interests.

### Author contributions

D.F., J.A.D. and L.N. conceptualized experiments and wrote the manuscript. D.F. and T.S. performed experiments. J.A.D. and L.N. provided supervision, and J.A.D. secured funding. M.J.O. provided expertise and feedback on experiments and the manuscript.

### Funding

This work was supported by Natural Sciences and Engineering Research Council of Canada Discovery Grants (RGPIN 227828-10 and RGPIN 23898-2007), Natural Sciences and Engineering Research Council of Canada Collaborative Research and Development Grant (CRDPJ 401634-10) and Chemtura Canada Co.

### References

- Barragan, A., Weidner, J. M., Jin, Z., Korpi, E. R. and Birnir, B. (2015). GABAergic signalling in the immune system. *Acta Physiol.* **213**, 819–827.
- Beg, A. A., Ernstrom, G. G., Nix, P., Davis, M. W. and Jorgensen, E. M. (2008). Protons act as a transmitter for muscle contraction in *C. elegans*. *Cell* **132**, 149–160.
- Beyenbach, K. W. (1995). Mechanism and regulation of electrolyte transport in Malpighian tubules. *J. Insect Physiol.* **41**, 197–207.
- Beyenbach, K. W. and Piermarini, P. M. (2011). Transcellular and paracellular pathways of transepithelial fluid secretion in Malpighian (renal) tubules of the yellow fever mosquito *Aedes aegypti*. *Acta Physiol.* **202**, 387–407.
- Beyenbach, K. W., Oviedo, A. and Aneshansley, D. J. (1993). Malpighian tubules of *Aedes aegypti*: five tubules, one function. *J. Insect Physiol.* **39**, 639–648.
- Beyenbach, K. W., Baumgart, S., Lau, K., Piermarini, P. M. and Zhang, S. (2009). Signaling to the apical membrane and to the paracellular pathway: changes in the cytosolic proteome of *Aedes* Malpighian tubules. *J. Exp. Biol.* **212**, 329–340.
- Blumenthal, E. M. (2003). Regulation of chloride permeability by endogenously produced tyramine in the *Drosophila* Malpighian tubule. *Am. J. Physiol. Cell Physiol.* **284**, C718–C728.
- Bocquet, N., Prado de Carvalho, L., Cartaud, J., Neyton, J., Le Poupon, C., Taly, A., Grutter, T., Changeux, J.-P. and Corringer, P.-J. (2007). A prokaryotic



- proton-gated ion channel from the nicotinic acetylcholine receptor family. *Nature* **445**, 116–119.
- Bocquet, N., Nury, H., Baaden, M., Le Poupon, C., Changeux, J.-P., Delarue, M. and Corringer, P.-J.** (2009). X-ray structure of a pentameric ligand-gated ion channel in an apparently open conformation. *Nature* **457**, 111–114.
- Borovikova, L. V., Ivanova, S., Zhang, M., Yang, H., Botchkina, G. I., Watkins, L. R., Wang, H., Abumrad, N., Eaton, J. W. and Tracey, K. J.** (2000). Vagus nerve stimulation attenuates the systemic inflammatory response to endotoxin. *Nature* **405**, 458–462.
- Boulin, T., Gielen, M., Richmond, J. E., Williams, D. C., Paoletti, P. and Bessereau, J.-L.** (2008). Eight genes are required for functional reconstitution of the *Caenorhabditis elegans* levamisole-sensitive acetylcholine receptor. *Proc. Natl. Acad. Sci. USA* **105**, 18590–18595.
- Cabrero, P., Radford, J. C., Broderick, K. E., Costes, L., Veenstra, J. A., Spana, E. P., Davies, S. A. and Dow, J. A. T.** (2002). The Dh gene of *Drosophila melanogaster* encodes a diuretic peptide that acts through cyclic AMP. *J. Exp. Biol.* **205**, 3799–3807.
- Cabrero, P., Terhzaz, S., Romero, M. F., Davies, S. A., Blumenthal, E. M. and Dow, J. A. T.** (2014). Chloride channels in stellate cells are essential for uniquely high secretion rates in neuropeptide-stimulated *Drosophila* diuresis. *Proc. Natl. Acad. Sci. USA* **111**, 14301–14306.
- Cary, R., Klymkowsky, M., Evans, R., Domingo, A., Dent, J. and Backhus, L.** (1994). Vimentin's tail interacts with actin-containing structures in vivo. *J. Cell Sci.* **107**, 1609–1622.
- Chahine, S., Seabrooke, S. and O'Donnell, M. J.** (2012). Effects of genetic knock-down of organic anion transporter genes on secretion of fluorescent organic ions by Malpighian tubules of *Drosophila melanogaster*. *Arch. Insect Biochem. Physiol.* **81**, 228–240.
- Chintapalli, V. R., Wang, J. and Dow, J. A. T.** (2007). Using FlyAtlas to identify better *Drosophila melanogaster* models of human disease. *Nat. Genet.* **39**, 715–720.
- Coast, G. M., Webster, S. G., Schegg, K. M., Tobe, S. S. and Schooley, D. A.** (2001). The *Drosophila melanogaster* homologue of an insect calcitonin-like diuretic peptide stimulates V-ATPase activity in fruit fly Malpighian tubules. *J. Exp. Biol.* **204**, 1795–1804.
- Davies, P. A., Wang, W., Hales, T. G. and Kirkness, E. F.** (2003). A novel class of ligand-gated ion channel is activated by Zn<sup>2+</sup>. *J. Biol. Chem.* **278**, 712–717.
- Day, J. P., Wan, S., Allan, A. K., Kean, L., Davies, S. A., Gray, J. V. and Dow, J. A. T.** (2008). Identification of two partners from the bacterial Kef exchanger family for the apical plasma membrane V-ATPase of Metazoa. *J. Cell Sci.* **121**, 2612–2619.
- Dent, J. A.** (2006). Evidence for a diverse Cys-loop ligand-gated ion channel superfamily in early bilateria. *J. Mol. Evol.* **62**, 523–535.
- Dent, J. A., Davis, M. W. and Avery, L.** (1997). *avr-15* encodes a chloride channel subunit that mediates inhibitory glutamatergic neurotransmission and ivermectin sensitivity in *Caenorhabditis elegans*. *EMBO J.* **16**, 5867–5879.
- Dionisio, L., José De Rosa, M., Bouzat, C. and Esandi, M. D. C.** (2011). An intrinsic GABAergic system in human lymphocytes. *Neuropharmacology* **60**, 513–519.
- Dow, J. A., Maddrell, S. H., Görtz, A., Skaer, N. J., Brogan, S. and Kaiser, K.** (1994). The malpighian tubules of *Drosophila melanogaster*: a novel phenotype for studies of fluid secretion and its control. *J. Exp. Biol.* **197**, 421–428.
- Du, J., Kean, L., Allan, A. K., Southall, T. D., Davies, S. A., McInerney, C. J. and Dow, J. A. T.** (2006). The SzA mutations of the B subunit of the *Drosophila* vacuolar H<sup>+</sup> ATPase identify conserved residues essential for function in fly and yeast. *J. Cell Sci.* **119**, 2542–2551.
- Dubreuil, R. R.** (2004). Copper cells and stomach acid secretion in the *Drosophila* midgut. *Int. J. Biochem. Cell Biol.* **36**, 742–752.
- Dufour, V., Beech, R. N., Wever, C., Dent, J. A. and Geary, T. G.** (2013). Molecular cloning and characterization of novel glutamate-gated chloride channel subunits from *Schistosoma mansoni*. *PLoS Pathog.* **9**, e1003586.
- Eggleton, R. D., Brown, K. C. and Dasgupta, P.** (2009). Angiogenic activity of nicotinic acetylcholine receptors: implications in tobacco-related vascular diseases. *Pharmacol. Ther.* **121**, 205–223.
- Froh, M., Thurman, R. G. and Wheeler, M. D.** (2002). Molecular evidence for a glycine-gated chloride channel in macrophages and leukocytes. *Am. J. Physiol. Gastrointest. Liver Physiol.* **283**, G856–G863.
- Galzi, J.-L., Devillers-Thiéry, A., Hussy, N., Bertrand, S., Changeux, J.-P. and Bertrand, D.** (1992). Mutations in the channel domain of a neuronal nicotinic receptor convert ion selectivity from cationic to anionic. *Nature* **359**, 500–505.
- Gengs, C., Leung, H.-T., Skingsley, D. R., Iovchev, M. I., Yin, Z., Semenov, E. P., Burg, M. G., Hardie, R. C. and Pak, W. L.** (2002). The target of *Drosophila* photoreceptor synaptic transmission is a histamine-gated chloride channel encoded by *hclA*. *J. Biol. Chem.* **277**, 42113–42120.
- Gisselmann, G., Plonka, J., Pusch, H. and Hatt, H.** (2004). *Drosophila melanogaster* GRD and LCCH3 subunits form heteromultimeric GABA-gated cation channels. *Br. J. Pharmacol.* **142**, 409–413.
- Goldin, A. L.** (1992). *Ion Channels*, Methods in Enzymology Vol. 207 (ed. B. Rudy and L. E. Iverson). San Diego: Academic Press.
- Grando, S. A., Horton, R. M., Pereira, E. F., Diethelm-Okita, B. M., George, P. M., Albuquerque, E. X. and Conti-Fine, B. M.** (1995). A nicotinic acetylcholine receptor regulating cell adhesion and motility is expressed in human keratinocytes. *J. Invest. Dermatol.* **105**, 774–781.
- Graveley, B. R., Brooks, A. N., Carlson, J. W., Duff, M. O., Landolin, J. M., Yang, L., Artieri, C. G., van Baren, M. J., Boley, N., Booth, B. W. et al.** (2011). The developmental transcriptome of *Drosophila melanogaster*. *Nature* **471**, 473–479.
- Gunthorpe, M. J. and Lummis, S. C.** (2001). Conversion of the ion selectivity of the 5-HT(3a) receptor from cationic to anionic reveals a conserved feature of the ligand-gated ion channel superfamily. *J. Biol. Chem.* **276**, 10977–10983.
- Hille, B.** (2001). *Ion Channels of Excitable Membranes*, 3rd edn. Sunderland, MA: Sinauer Associates, Inc.
- Johnson, E. C., Shafer, O. T., Trigg, J. S., Park, J., Schooley, D. A., Dow, J. A. and Taghert, P. H.** (2005). A novel diuretic hormone receptor in *Drosophila*: evidence for conservation of CGRP signaling. *J. Exp. Biol.* **208**, 1239–1246.
- Jones, A. K. and Sattelle, D. B.** (2006). The cys-loop ligand-gated ion channel superfamily of the honeybee, *Apis mellifera*. *Invert. Neurosci.* **6**, 123–132.
- Jones, A. K. and Sattelle, D. B.** (2007). The cys-loop ligand-gated ion channel gene superfamily of the red flour beetle, *Tribolium castaneum*. *BMC Genomics* **8**, 327.
- Jones, A. K., Bera, A. N., Lees, K. and Sattelle, D. B.** (2010). The cys-loop ligand-gated ion channel gene superfamily of the parasitoid wasp, *Nasonia vitripennis*. *Heredity* **104**, 247–259.
- Karlin, A.** (2002). Emerging structure of the nicotinic acetylcholine receptors. *Nat. Rev. Neurosci.* **3**, 102–114.
- Kehoe, J., Buldakova, S., Acher, F., Dent, J., Bregestovski, P. and Bradley, J.** (2009). *Aplysia* cys-loop glutamate-gated chloride channels reveal convergent evolution of ligand specificity. *J. Mol. Evol.* **69**, 125–141.
- Le Novère, N., Corringer, P.-J. and Changeux, J.-P.** (2002). The diversity of subunit composition in nAChRs: evolutionary origins, physiologic and pharmacologic consequences. *J. Neurobiol.* **53**, 447–456.
- Linton, S. M. and O'Donnell, M. J.** (1999). Contributions of K<sup>+</sup>:Cl<sup>-</sup> cotransport and Na<sup>+</sup>/K<sup>+</sup>-ATPase to basolateral ion transport in malpighian tubules of *Drosophila melanogaster*. *J. Exp. Biol.* **202**, 1561–1570.
- Littleton, J. T. and Ganetzky, B.** (2000). Ion channels and synaptic organization. *Neuron* **26**, 35–43.
- Lummis, S. C. R., Beene, D. L., Lee, L. W., Lester, H. A., Broadhurst, R. W. and Dougherty, D. A.** (2005). Cis-trans isomerization at a proline opens the pore of a neurotransmitter-gated ion channel. *Nature* **438**, 248–252.
- Maddrell, S. and O'Donnell, M.** (1992). Insect malpighian tubules: v-atpase action in ion and fluid transport. *J. Exp. Biol.* **172**, 417–429.
- Maouche, K., Medjber, K., Zahm, J.-M., Delavoie, F., Terryn, C., Coraux, C., Pons, S., Cloëz-Tayarani, I., Maskos, U., Birembaut, P., et al.** (2013). Contribution of  $\alpha 7$  nicotinic receptor to airway epithelium dysfunction under nicotine exposure. *Proc. Natl. Acad. Sci. USA* **110**, 4099–4104.
- Maus, A. D., Pereira, E. F., Karachunski, P. I., Horton, R. M., Navaneetham, D., Macklin, K., Cortes, E. W. S., Albuquerque, E. X. and Conti-Fine, B. M.** (1998). Human and rodent bronchial epithelial cells express functional nicotinic acetylcholine receptors. *Mol. Pharmacol.* **54**, 779–788.
- McNulty, M., Puljung, M., Jefford, G. and Dubreuil, R. R.** (2001). Evidence that a copper-metallothionein complex is responsible for fluorescence in acid-secreting cells of the *Drosophila* stomach. *Cell Tissue Res.* **304**, 383–389.
- Miyauchi, J. T., Piermarini, P. M., Yang, J. D., Gilligan, D. M. and Beyenbach, K. W.** (2013). Roles of PKC and phospho-adducin in transepithelial fluid secretion by Malpighian tubules of the yellow fever mosquito. *Tissue Barriers* **1**, e23120.
- Mounsey, K. E., Dent, J. A., Holt, D. C., McCarthy, J., Currie, B. J. and Walton, S. F.** (2007). Molecular characterisation of a pH-gated chloride channel from *Sarcoptes scabiei*. *Invert. Neurosci.* **7**, 149–156.
- Nicolson, S. W.** (1993). The ionic basis of fluid secretion in insect Malpighian tubules: advances in the last ten years. *J. Insect Physiol.* **39**, 451–458.
- O'Donnell, M. J. and Maddrell, S. H.** (1995). Fluid reabsorption and ion transport by the lower Malpighian tubules of adult female *Drosophila*. *J. Exp. Biol.* **198**, 1647–1653.
- O'Donnell, M. J. and Rheault, M. R.** (2005). Ion-selective microelectrode analysis of salicylate transport by the Malpighian tubules and gut of *Drosophila melanogaster*. *J. Exp. Biol.* **208**, 93–104.
- O'Donnell, M. J., Dow, J. A., Huesmann, G. R., Tublitz, N. J. and Maddrell, S. H.** (1996). Separate control of anion and cation transport in malpighian tubules of *Drosophila melanogaster*. *J. Exp. Biol.* **199**, 1163–1175.
- O'Donnell, M. J., Rheault, M. R., Davies, S. A., Rosay, P., Harvey, B. J., Maddrell, S. H. P., Kaiser, K. and Dow, J. A. T.** (1998). Hormonally controlled chloride movement across *Drosophila* tubules is via ion channels in stellate cells. *Am. J. Physiol. Regul. Integr. Comp. Physiol.* **274**, R1039–R1049.
- Ortells, M. O. and Lunt, G. G.** (1995). Evolutionary history of the ligand-gated ion-channel superfamily of receptors. *Trends Neurosci.* **18**, 121–127.
- Parks, A. L., Cook, K. R., Belvin, M., Dompe, N. A., Fawcett, R., Huppert, K., Tan, L. R., Winter, C. G., Bogart, K. P., Deal, J. E., et al.** (2004). Systematic generation of high-resolution deletion coverage of the *Drosophila melanogaster* genome. *Nat. Genet.* **36**, 288–292.

- Patton, A., Knuth, S., Schaheen, B., Dang, H., Greenwald, I. and Fares, H. (2005). Endocytosis function of a ligand-gated ion channel homolog in *Caenorhabditis elegans*. *Curr. Biol.* **15**, 1045–1050.
- Petzel, D. H., Pirotte, P. T. and Van Kerkhove, E. (1999). Intracellular and luminal pH measurements of Malpighian tubules of the mosquito *Aedes aegypti*: the effects of cAMP. *J. Insect Physiol.* **45**, 973–982.
- Phillips, J. (1981). Comparative physiology of insect renal function. *Am. J. Physiol. Regul. Integr. Comp. Physiol.* **241**, R241–R257.
- Piermarini, P. M., Grogan, L. F., Lau, K., Wang, L. and Beyenbach, K. W. (2010). A SLC4-like anion exchanger from renal tubules of the mosquito (*Aedes aegypti*): evidence for a novel role of stellate cells in diuretic fluid secretion. *Am. J. Physiol. Regul. Integr. Comp. Physiol.* **298**, R642–R660.
- Prud'homme, G. J., Glinka, Y. and Wang, Q. (2015). Immunological GABAergic interactions and therapeutic applications in autoimmune diseases. *Autoimmun. Rev.* **14**, 1048–1056.
- Purohit, P., Mitra, A. and Auerbach, A. (2007). A stepwise mechanism for acetylcholine receptor channel gating. *Nature* **446**, 930–933.
- Putrenko, I., Zakikhani, M. and Dent, J. A. (2005). A family of acetylcholine-gated chloride channel subunits in *Caenorhabditis elegans*. *J. Biol. Chem.* **280**, 6392–6398.
- Ranganathan, R., Cannon, S. C. and Horvitz, H. R. (2000). MOD-1 is a serotonin-gated chloride channel that modulates locomotory behaviour in *C. elegans*. *Nature* **408**, 470–475.
- Remnant, E. J., Williams, A., Lumb, C., Yang, Y. T., Chan, J., Duchêne, S., Daborn, P. J., Batterham, P. and Perry, T. (2016). Evolution, expression, and function of non-neuronal ligand-gated chloride channels in *Drosophila melanogaster*. *G3 (Bethesda)*, pii: g3.116.029546.
- Ringstad, N., Abe, N. and Horvitz, H. R. (2009). Ligand-gated chloride channels are receptors for biogenic amines in *C. elegans*. *Science* **325**, 96–100.
- Rosas-Ballina, M., Olofsson, P. S., Ochani, M., Valdés-Ferrer, S. I., Levine, Y. A., Reardon, C., Tusche, M. W., Pavlov, V. A., Andersson, U., Chavan, S., et al. (2011). Acetylcholine-synthesizing T cells relay neural signals in a vagus nerve circuit. *Science* **334**, 98–101.
- Schnizler, K., Saeger, B., Pfeffer, C., Gerbault, A., Ebbinghaus-Kintscher, U., Methfessel, C., Franken, E.-M., Raming, K., Wetzler, C. H., Saras, A. et al. (2005). A novel chloride channel in *Drosophila melanogaster* is inhibited by protons. *J. Biol. Chem.* **280**, 16254–16262.
- Shanbhag, S. and Tripathi, S. (2005). Electrogenic H<sup>+</sup> transport and pH gradients generated by a V-H<sup>+</sup>-ATPase in the isolated perfused larval *Drosophila* midgut. *J. Membr. Biol.* **206**, 61–72.
- Sine, S. M. and Engel, A. G. (2006). Recent advances in Cys-loop receptor structure and function. *Nature* **440**, 448–455.
- Talwar, S. and Lynch, J. W. (2014). Phosphorylation mediated structural and functional changes in pentameric ligand-gated ion channels: implications for drug discovery. *Int. J. Biochem. Cell Biol.* **53**, 218–223.
- Tasneem, A., Iyer, L. M., Jakobsson, E. and Aravind, L. (2005). Identification of the prokaryotic ligand-gated ion channels and their implications for the mechanisms and origins of animal Cys-loop ion channels. *Genome Biol.* **6**, R4.
- Thibault, S. T., Singer, M. A., Miyazaki, W. Y., Milash, B., Dompe, N. A., Singh, C. M., Buchholz, R., Demsky, M., Fawcett, R., Francis-Lang, H. L. et al. (2004). A complementary transposon tool kit for *Drosophila melanogaster* using P and piggyBac. *Nat. Genet.* **36**, 283–287.
- Torrie, L. S., Radford, J. C., Southall, T. D., Kean, L., Dinsmore, A. J., Davies, S. A. and Dow, J. A. T. (2004). Resolution of the insect ouabain paradox. *Proc. Natl. Acad. Sci. USA* **101**, 13689–13693.
- Tracey, K. J. (2002). The inflammatory reflex. *Nature* **420**, 853–859.
- van Nierop, P., Keramidis, A., Bertrand, S., van Minnen, J., Gouwenberg, Y., Bertrand, D. and Smit, A. B. (2005). Identification of molluscan nicotinic acetylcholine receptor (nAChR) subunits involved in formation of cation- and anion-selective nAChRs. *J. Neurosci.* **25**, 10617–10626.
- Weng, X.-H., Huss, M., Wieczorek, H. and Beyenbach, K. W. (2003). The V-type H<sup>+</sup>-ATPase in Malpighian tubules of *Aedes aegypti*: localization and activity. *J. Exp. Biol.* **206**, 2211–2219.
- Zarghooni, S., Wunsch, J., Bodenbenner, M., Brüggmann, D., Grando, S. A., Schwantes, U., Wess, J., Kummer, W. and Lips, K. S. (2007). Expression of muscarinic and nicotinic acetylcholine receptors in the mouse urothelium. *Life Sci.* **80**, 2308–2313.
- Zheng, Y., Hirschberg, B., Yuan, J., Wang, A. P., Hunt, D. C., Ludmerer, S. W., Schmatz, D. M. and Cully, D. F. (2002). Identification of two novel *Drosophila melanogaster* histamine-gated chloride channel subunits expressed in the eye. *J. Biol. Chem.* **277**, 2000–2005.
